# Supplementary material for: Communities of Digger Wasps (Hymenoptera: Spheciformes) along a Tree Cover Gradient in the Cultural Landscape of River Valleys in Poland
Source: MDPI journal article supplement (doi:10.3390/insects15020088), 2024-01-29
Supplement: s1 [file s1]

*Supplementary Materials*

# **Communities of Digger Wasps (Hymenoptera: Spheciformes) along a Tree Cover Gradient in the Cultural Landscape of River Valleys in Poland**

Piotr Olszewski, Tim Sparks, Lucyna Twerd and Bogdan Wiśniowski

**Table S1.** Numbers, estimated flight period, information on adult foodplants, larval prey, nesting type and prey types of the species recorded at nine sites in the cultural landscape of the river valleys of northern Poland during 2011–2013; *n* – number of samples.

| No | Species and status<br>(where appropriate)              | Sites               |                     |                     |                    |                    |                    |                    |                    |                    | Total number<br>of specimens | Observations from current research |                                                                                                                                                                                                    | Data from Literature        |                       |
|----|--------------------------------------------------------|---------------------|---------------------|---------------------|--------------------|--------------------|--------------------|--------------------|--------------------|--------------------|------------------------------|------------------------------------|----------------------------------------------------------------------------------------------------------------------------------------------------------------------------------------------------|-----------------------------|-----------------------|
|    |                                                        | PT<br><i>n</i> = 82 | SI<br><i>n</i> = 96 | GR<br><i>n</i> = 68 | ZP<br><i>n</i> =70 | GN<br><i>n</i> =87 | TP<br><i>n</i> =67 | TG<br><i>n</i> =73 | GE<br><i>n</i> =58 | EL<br><i>n</i> =74 |                              | Flight pe-<br>riod                 | Remarks on prey (P) and food<br>plants of adults (F)                                                                                                                                               | Nest-<br>ing <sup>3,4</sup> | Prey <sup>1,2,?</sup> |
| 1  | <i>Alysson spinosus</i><br>(Panzer, 1801)              |                     | 24                  | 32                  |                    | 4                  |                    | 1                  | 1                  |                    | 62                           | June – early<br>August             | (P) Delphacidae and Cicadelli-<br>dae ( <i>Jassargus</i> spp. and <i>Strep-<br/>tanus</i> spp.)<br>(F) honeydew on the leaves of<br><i>Tilia cordata</i> Mill.                                     | En <sup>3</sup>             | He-ot <sup>1</sup>    |
| 2  | <i>Argogorytes mysta-<br/>ceus</i><br>(Linnaeus, 1761) |                     |                     |                     | 1                  |                    |                    |                    |                    |                    | 1                            | early May –<br>early July          | (P) not observed<br>(F) <i>Solidago</i> spp. flowers                                                                                                                                               | En <sup>3</sup>             | He-ot <sup>1</sup>    |
| 3  | <i>Astata boops</i><br>(Schrank, 1781)                 |                     | 4                   | 2                   | 1                  | 5                  |                    |                    |                    | 2                  | 14                           | mid June –<br>late July            | (P) <i>Alydus calcaratus</i> (L.)<br>(F) <i>Solidago</i> spp. flowers                                                                                                                              | En <sup>3</sup>             | He-ot <sup>1</sup>    |
| 4  | <i>A. kashmirensis</i><br>DD<br>Nurse, 1909            |                     | 1                   |                     |                    |                    |                    |                    |                    |                    | 1                            | late June –<br>early July          | (P) and (F) not observed                                                                                                                                                                           | En <sup>3</sup>             | He-ot <sup>2</sup>    |
| 5  | <i>A. minor</i><br>Kohl, 1885                          |                     | 2                   |                     | 7                  | 7                  |                    |                    |                    | 2                  | 18                           | mid – late<br>June                 | (P) and (F) not observed                                                                                                                                                                           | En <sup>3</sup>             | He-ot <sup>1</sup>    |
| 6  | <i>Bembecinus tridens</i><br>LC<br>(Fabricius, 1781)   |                     | 17                  | 2                   |                    | 10                 | 115                | 59                 | 24                 |                    | 227                          | late May –<br>late Septem-<br>ber  | (P) not observed<br>(F) <i>Scleranthus</i> spp., <i>Solidago</i><br>spp. and <i>Thymus serpyllum</i> L.<br>flowers                                                                                 | En <sup>3</sup>             | He-ot <sup>2</sup>    |
| 7  | <i>Bembix rostrata</i><br>LC<br>(Linnaeus, 1758)       |                     | 9                   | 8                   |                    | 13                 |                    | 2                  | 1                  |                    | 33                           | mid June –<br>late August          | (P) <i>Eristalis</i> spp. and <i>Lucilia<br/>caesar</i> L.<br>(F) <i>Melilotus albus</i> Medik, <i>Soli-<br/>dago</i> spp., <i>T. serpyllum</i> and <i>Ve-<br/>ronica spicata</i> L. flowers       | En <sup>3</sup>             | Dip <sup>1</sup>      |
| 8  | <i>Cerceris arenaria</i><br>(Linnaeus, 1758)           |                     |                     |                     |                    | 2                  | 8                  | 7                  | 8                  | 10                 | 35                           | mid May –<br>late Septem-<br>ber   | (P) <i>Brachyderes incanus</i> (L.)<br>(F) <i>M. albus</i> , <i>Peucedanum ore-<br/>oselinum</i> (L.) Moench, <i>Solidago</i><br>spp., <i>T. serpyllum</i> and <i>Veronica<br/>spicata</i> flowers | En <sup>3</sup>             | Col <sup>1</sup>      |
| 9  | <i>C. flavilabris</i><br>NT<br>(Fabricius, 1793)       |                     |                     |                     |                    |                    |                    |                    | 2                  |                    | 2                            | late July –<br>early August        | (P) not observed<br>(F) <i>Solidago</i> spp. flowers                                                                                                                                               | En <sup>3</sup>             | Col <sup>2</sup>      |
| 10 | <i>C. interrupta</i><br>(Panzer, 1799)                 |                     | 3                   |                     |                    | 1                  |                    |                    |                    |                    | 4                            | late June –<br>late August         | (P) not observed<br>(F) <i>V. spicata</i> flowers                                                                                                                                                  | En <sup>3</sup>             | Col <sup>2</sup>      |
| 11 | <i>C. quadrifasciata</i><br>(Panzer, 1799)             |                     |                     |                     |                    |                    |                    | 1                  |                    |                    | 1                            | mid June                           | (P) and (F) not observed                                                                                                                                                                           | En <sup>3</sup>             | Col <sup>1</sup>      |
| 12 | <i>C. quinquefasciata</i><br>(Rossi, 1792)             | 3                   | 18                  | 1                   | 18                 |                    | 2                  | 5                  | 12                 |                    | 59                           | mid June –<br>mid August           | (P) not observed<br>(F) <i>Jasione montana</i> L., <i>P. ore-<br/>oselinum</i> and <i>V. spicata</i> flowers                                                                                       | En <sup>3</sup>             | Col <sup>1</sup>      |

|    |                                                                                    |   |    |    |    |    |   |   |    |   |    |                              |                                                                                                                                                                                                                                                                 |                     |                         |
|----|------------------------------------------------------------------------------------|---|----|----|----|----|---|---|----|---|----|------------------------------|-----------------------------------------------------------------------------------------------------------------------------------------------------------------------------------------------------------------------------------------------------------------|---------------------|-------------------------|
| 13 | <i>C. rybyensis</i><br>(Linnaeus, 1771)                                            | 2 | 5  | 23 | 14 | 14 | 5 | 7 | 17 | 8 | 95 | mid June –<br>late September | (P) <i>Halictus subauratus</i> (Rossi)<br>and <i>H. tumulorum</i> (L.)<br>(F) <i>Calluna vulgaris</i> (L.) Hull,<br><i>J. montana</i> , <i>M. albus</i> , <i>P. oreoselinum</i> ,<br><i>Solidago</i> spp., <i>T. serpyllum</i> and <i>V. spicata</i><br>flowers | En <sup>3</sup>     | Hym <sup>1</sup>        |
| 14 | <i>Crabro cribrarius</i><br>(Linnaeus, 1758)                                       | 1 | 22 |    |    |    |   | 3 |    |   | 26 | mid June –<br>early August   | (P) not observed<br>(F) <i>P. oreoselinum</i> , <i>Solidago</i><br>spp. and <i>V. spicata</i> flowers                                                                                                                                                           | En(Hy) <sup>3</sup> | Dip <sup>1</sup>        |
| 15 | <i>C. peltarius</i><br>(Schreber, 1784)                                            |   | 9  | 3  |    |    | 4 | 4 |    |   | 20 | mid May –<br>mid July        | (P) Imagines of <i>Acrosathe</i> spp.<br>(F) <i>C. vulgaris</i> , <i>P. oreoselinum</i> ,<br><i>Solidago</i> spp. and <i>V. spicata</i><br>flowers                                                                                                              | En <sup>3</sup>     | Dip <sup>1</sup>        |
| 16 | <i>Crossocerus annulipes</i><br>(Lepeletier de Saint<br>Fargeau & Brullé,<br>1835) | 3 | 2  |    |    |    |   |   |    | 1 | 6  | late May –<br>late           | (P) not observed<br>(F) <i>Heracleum sphondylium</i> L.,<br>flowers and honeydew on the<br>leaves of <i>Acer campestre</i> L. and<br><i>Ulmus minor</i> Mill.                                                                                                   | Hy <sup>3</sup>     | He-ot <sup>1</sup>      |
| 17 | <i>C. capitosus</i><br>(Shuckard, 1837)                                            | 1 | 2  |    |    |    |   |   |    |   | 3  | August<br>early September    | (P) not observed<br>(F) <i>P. oreoselinum</i> flowers                                                                                                                                                                                                           | Hy <sup>3</sup>     | Dip(He-ot) <sup>1</sup> |
| 18 | <i>C. cetratus</i><br>(Shuckard, 1837)                                             | 3 |    |    |    |    |   |   |    |   | 3  | early August                 | (P) not observed<br>(F) <i>H. sphondylium</i> flowers<br>and honeydew on the leaves<br>of <i>A. campestre</i>                                                                                                                                                   | Hy <sup>3</sup>     | Dip <sup>1</sup>        |
| 19 | <i>C. cinxius</i><br>LC<br>(Dahlbom, 1838)                                         |   | 1  |    |    |    |   |   |    |   | 1  | late June                    | (P) not observed<br>(F) honeydew on the leaves of<br><i>Syringa vulgaris</i> L.                                                                                                                                                                                 | Hy <sup>3</sup>     | Dip\He-ot <sup>1</sup>  |
| 20 | <i>C. distinguendus</i><br>(A. Morawitz, 1866)                                     |   | 1  |    | 1  |    |   |   |    |   | 2  | early – mid<br>June          | (P) not observed<br>(F) <i>P. oreoselinum</i> flowers<br>and honeydew on the leaves<br>of <i>A. campestre</i>                                                                                                                                                   | Hy(e?) <sup>3</sup> | Dip <sup>1</sup>        |
| 21 | <i>C. elongatulus</i><br>(Vander Linden,<br>1829)                                  | 1 |    |    |    |    |   |   |    |   | 1  | mid August                   | (P) not observed<br>(F) <i>H. sphondylium</i> flowers                                                                                                                                                                                                           | En\Hy <sup>3</sup>  | Dip <sup>1</sup>        |
| 22 | <i>C. exiguus</i><br>(Vander Linden,<br>1829)                                      | 2 |    |    | 4  | 1  |   |   |    |   | 7  | late June –<br>late August   | (P) not observed<br>(F) honeydew on the leaves of<br><i>A. campestre</i> and <i>H. sphondylium</i><br>flowers                                                                                                                                                   | En <sup>3</sup>     | He-ot <sup>1</sup>      |
| 23 | <i>C. leucostoma</i><br>(Linnaeus, 1758)                                           | 1 |    |    |    |    |   |   |    |   | 1  | late June                    | (P) not observed<br>(F) <i>H. sphondylium</i> flowers                                                                                                                                                                                                           | Hy <sup>3</sup>     | Dip <sup>1</sup>        |
| 24 | <i>C. megacephalus</i><br>(Rossi, 1790)                                            | 1 |    |    |    |    |   |   |    |   | 1  | mid July                     | (P) not observed<br>(F) <i>H. sphondylium</i> flowers                                                                                                                                                                                                           | Hy <sup>3</sup>     | Dip(Hym) <sup>1</sup>   |
| 25 | <i>C. nigratus</i>                                                                 | 3 | 1  |    |    |    |   |   |    |   | 4  | late June –<br>mid August    | (P) not observed<br>(F) <i>P. oreoselinum</i> flowers                                                                                                                                                                                                           | Hy <sup>3</sup>     | Dip <sup>1</sup>        |

[illegible]

|    |                                                                       |    |    |   |    |   |    |   |    |     |                               |                                                                                                                                    |                 |                     |
|----|-----------------------------------------------------------------------|----|----|---|----|---|----|---|----|-----|-------------------------------|------------------------------------------------------------------------------------------------------------------------------------|-----------------|---------------------|
| 37 | <i>D. minutus</i><br>(Fabricius, 1793)                                | 34 | 20 | 3 | 33 | 9 | 14 | 1 | 77 | 191 | early May –<br>late September | (P) not observed<br>(F) <i>P. oreoselinum</i> flowers<br>and honeydew on the leaves<br>of <i>S. vulgaris</i> and <i>T. cordata</i> | En <sup>3</sup> | He-ap <sup>1</sup>  |
| 38 | <i>D. tristis</i><br>(Vander Linden,<br>1829)                         | 26 |    | 1 | 20 |   |    | 1 |    | 48  | mid June –<br>late September  | (P) Aphididae<br>(F) <i>P. oreoselinum</i> flowers                                                                                 | En <sup>3</sup> | He-ap <sup>1</sup>  |
| 39 | <i>Dryudella pinguis</i><br>LC<br>(Dahlbom, 1832)                     |    |    |   |    |   | 1  |   |    | 1   | late June                     | (P) and (F) not observed                                                                                                           | En <sup>3</sup> | He-ot <sup>1</sup>  |
| 40 | <i>D. stigma</i><br>(Panzer, 1809)                                    | 10 |    |   | 8  | 3 | 3  | 3 |    | 27  | mid June –<br>mid September   | (P) and (F) not observed                                                                                                           | En <sup>3</sup> | He-ot <sup>1</sup>  |
| 41 | <i>Ectemnius cavifrons</i><br>(Thomson, 1870)                         | 1  |    | 1 |    |   |    |   |    | 2   | mid June –<br>mid August      | (P) not observed<br>(F) <i>Solidago</i> spp. flowers                                                                               | Hy <sup>3</sup> | Dip <sup>1</sup>    |
| 42 | <i>E. continuus</i><br>(Fabricius, 1804)                              | 17 | 5  | 1 | 11 | 2 | 1  | 3 | 4  | 44  | mid May –<br>mid September    | (P) not observed<br>(F) <i>H. sphondylium</i> , <i>P. oreoselinum</i> and <i>Solidago</i> spp.<br>flowers                          | Hy <sup>3</sup> | Dip <sup>1</sup>    |
| 43 | <i>E. dives</i><br>(Lepeletier de Saint<br>Fargeau & Brullé,<br>1835) | 1  | 2  | 1 |    |   |    |   |    | 4   | mid June –<br>late July       | (P) not observed<br>(F) <i>P. oreoselinum</i> flowers                                                                              | Hy <sup>3</sup> | Dip <sup>1</sup>    |
| 44 | <i>E. fossorius</i><br>VU<br>(Linnaeus, 1758)                         | 1  |    |   |    |   |    |   |    | 1   | early July                    | (P) not observed<br>(F) <i>H. sphondylium</i> flowers                                                                              | Hy <sup>3</sup> | Dip <sup>1</sup>    |
| 45 | <i>E. guttatus</i><br>(Vander Linden,<br>1829)                        |    | 1  |   |    |   |    |   |    | 1   | early July                    | (P) and (F) not observed                                                                                                           | Hy <sup>3</sup> | Dip <sup>1</sup>    |
| 46 | <i>E. lapidarius</i><br>(Panzer, 1804)                                | 4  | 1  | 1 | 6  | 2 |    | 3 |    | 17  | mid May –<br>late September   | (P) not observed<br>(F) <i>H. sphondylium</i> , <i>P. oreoselinum</i> and <i>Solidago</i> spp.<br>flowers                          | Hy <sup>3</sup> | Dip <sup>1</sup>    |
| 47 | <i>E. rubicola</i><br>(Dufour & Perris,<br>1840)                      |    | 2  |   |    |   |    |   |    | 2   | Mid June                      | (P) not observed<br>(F) <i>P. oreoselinum</i> flowers                                                                              | Hy <sup>3</sup> | Dip <sup>1</sup>    |
| 48 | <i>Entomognathus brevis</i><br>(Vander Linden,<br>1829)               |    | 1  |   | 2  |   |    |   |    | 3   | late June –<br>early July     | (P) not observed<br>(F) <i>P. oreoselinum</i> and <i>Solidago</i> spp. flowers                                                     | En <sup>3</sup> | Col <sup>1</sup>    |
| 49 | <i>Gorytes fallax</i><br>LC<br>Handlirsch, 1888                       | 3  |    |   |    |   |    | 1 |    | 4   | late June –<br>early July     | (P) not observed<br>(F) <i>H. sphondylium</i> flowers                                                                              | En <sup>3</sup> | He-ot <sup>2?</sup> |
| 50 | <i>G. laticinctus</i><br>(Lepeletier de Saint-<br>Fargeau, 1832)      | 1  | 1  |   | 3  |   |    |   |    | 5   | Early July –<br>mid August    | (P) not observed<br>(F) <i>H. sphondylium</i> and <i>Solidago</i> spp. flowers                                                     | En <sup>3</sup> | He-ot <sup>1</sup>  |

|    |                                                                         |   |    |   |    |    |    |    |    |                          |                                                                                 |                                                                                                                                                          |                     |                        |
|----|-------------------------------------------------------------------------|---|----|---|----|----|----|----|----|--------------------------|---------------------------------------------------------------------------------|----------------------------------------------------------------------------------------------------------------------------------------------------------|---------------------|------------------------|
| 51 | <i>G. quadrifasciatus</i><br>(Fabricius, 1804)                          |   |    |   | 1  |    |    | 1  | 2  | Mid June –<br>early July | (P) not observed<br>(F) Apiaceae flowers                                        | En <sup>3</sup>                                                                                                                                          | He-ot <sup>1</sup>  |                        |
| 52 | <i>G. quinquecinctus</i><br>(Fabricius, 1793)                           | 6 | 5  |   |    |    | 1  |    | 12 | late June –<br>mid July  | (P) not observed<br>(F) <i>H. sphondylium</i> and <i>P. oreoselinum</i> flowers | En <sup>3</sup>                                                                                                                                          | He-ot <sup>1?</sup> |                        |
| 53 | <i>G. quinquefasciatus</i><br>(Panzer, 1798)                            |   | 17 | 3 | 1  |    |    | 1  | 23 | mid June –<br>mid July   | (P) not observed<br>(F) <i>P. oreoselinum</i> flowers                           | En <sup>3</sup>                                                                                                                                          | He-ot <sup>2</sup>  |                        |
| 54 | <i>Harpactus elegans</i><br>LC<br>Lepeletier de Saint-<br>Fargeau, 1832 | 1 | 3  |   |    | 2  | 2  | 2  | 11 | 21                       | early June –<br>early July                                                      | (P) not observed<br>(F) <i>Sedum</i> spp. flowers                                                                                                        | En <sup>3</sup>     | He-ot <sup>2</sup>     |
| 55 | <i>H. laevis</i><br>NT<br>(Latreille, 1792)                             |   | 2  |   |    |    |    | 2  | 1  | 5                        | mid July –<br>mid                                                               | (P) and (F) not observed                                                                                                                                 | En <sup>3</sup>     | He-ot <sup>2</sup>     |
|    |                                                                         |   |    |   |    |    |    |    |    |                          | September                                                                       |                                                                                                                                                          |                     |                        |
| 56 | <i>H. lunatus</i><br>(Dahlbom, 1832)                                    |   | 7  |   |    |    |    | 1  | 1  | 9                        | late June –<br>early Sep-<br>tember                                             | (P) and (F) not observed                                                                                                                                 | En <sup>3</sup>     | He-ot <sup>2</sup>     |
| 57 | <i>H. pulchellus</i><br>NT<br>A. Costa, 1859                            |   |    |   |    | 2  | 21 |    |    | 23                       | late May –<br>late August                                                       | (P) and (F) not observed                                                                                                                                 | En <sup>1,2</sup>   | He-ot <sup>1,2</sup>   |
| 58 | <i>Lestica alata</i><br>LC<br>(Panzer, 1797)                            |   | 7  |   |    |    |    |    | 16 | 23                       | mid June –<br>early July                                                        | (P) <i>Deltote bankiana</i> (F.),<br><i>Chrysoteuchia culmella</i> (L.)<br>and <i>Crambus lathoniellus</i><br>(Zincken)<br>(F) <i>V. spicata</i> flowers | En <sup>3</sup>     | Lep <sup>1</sup>       |
| 59 | <i>L. clypeata</i><br>(Schreber, 1759)                                  | 2 |    | 1 | 11 |    | 1  | 11 | 8  | 34                       | late May –<br>late August                                                       | (P) not observed<br>(F) <i>P. oreoselinum</i> , <i>Solidago</i><br>spp. flowers and honeydew on<br>the leaves of <i>Padus avium</i><br>Mill.             | Hy <sup>3</sup>     | Lep <sup>1</sup>       |
| 60 | <i>L. subterranea</i><br>NT<br>(Fabricius, 1775)                        | 1 | 1  |   |    |    | 1  | 2  | 1  | 6                        | late May –<br>mid August                                                        | (P) not observed<br>(F) <i>P. oreoselinum</i> and <i>Soli-<br/>dago</i> spp. flowers                                                                     | En <sup>3</sup>     | Lep <sup>1</sup>       |
| 61 | <i>Lindenius albilabris</i><br>(Fabricius, 1793)                        | 2 | 4  | 3 | 5  |    |    |    |    | 14                       | late June –<br>early Sep-<br>tember                                             | (P) not observed<br>(F) <i>P. oreoselinum</i> and <i>Soli-<br/>dago</i> spp. flowers                                                                     | En <sup>3</sup>     | He-ot\Dip <sup>1</sup> |
| 62 | <i>L. panzeri</i><br>(Vander Linden,<br>1829)                           |   |    | 2 | 6  | 2  | 2  |    |    | 12                       | mid June –<br>mid August                                                        | (P) not observed<br>(F) <i>P. oreoselinum</i> and <i>Soli-<br/>dago</i> spp. flowers                                                                     | En <sup>3</sup>     | Dip <sup>1</sup>       |
| 63 | <i>L. pygmaeus armatus</i><br>(Rossi, 1794)                             | 2 | 2  | 8 | 10 | 21 |    |    |    | 43                       | mid May –<br>late Septem-<br>ber                                                | (P) not observed<br>(F) <i>P. oreoselinum</i> and <i>Soli-<br/>dago</i> spp. flowers                                                                     | En <sup>3</sup>     | Hym(Dip) <sup>1</sup>  |

|    |                                                                      |   |   |    |   |    |    |    |    |    |     |                                       |                                                                                                                                                                 |                   |                     |
|----|----------------------------------------------------------------------|---|---|----|---|----|----|----|----|----|-----|---------------------------------------|-----------------------------------------------------------------------------------------------------------------------------------------------------------------|-------------------|---------------------|
| 64 | <i>Mellinus arvensis</i><br>(Linnaeus, 1758)                         | 1 | 1 | 22 | 8 | 22 |    | 21 | 38 | 1  | 114 | early August<br>– late Sep-<br>tember | (P) <i>Helina depuncta</i> (Fall.),<br><i>Pollenia</i> spp.<br>(F) <i>P. oreoselinum</i> , <i>H. sphon-</i><br><i>dylum</i> and <i>Solidago</i> spp.<br>flowers | En <sup>3</sup>   | Dip <sup>1</sup>    |
| 65 | <i>Mimesa bicolor</i><br>(Jurine, 1807)                              | 3 |   |    |   |    |    |    |    |    | 3   | early July                            | (P) not observed<br>(F) <i>H. sphondylium</i> flowers                                                                                                           | En <sup>3</sup>   | He-ot <sup>2</sup>  |
| 66 | <i>M. bruxellensis</i><br>Bondroit, 1934                             | 2 | 1 |    |   |    |    | 1  |    |    | 4   | early June –<br>early July            | (P) not observed<br>(F) <i>H. sphondylium</i> flowers                                                                                                           | En <sup>3</sup>   | He-ot <sup>2</sup>  |
| 67 | <i>M. equestris</i><br>(Fabricius, 1804)                             |   | 1 |    |   |    |    | 6  |    |    | 7   | mid August<br>– mid Sep-<br>tember    | (P) not observed<br>(F) <i>C. vulgaris</i> and <i>P. ore-</i><br><i>oselinum</i> flowers                                                                        | En <sup>3</sup>   | He-ot <sup>1</sup>  |
| 68 | <i>Mimumesa atratina</i><br>(F. Morawitz, 1891)                      | 2 |   |    |   |    |    | 2  |    |    | 4   | mid – late<br>June                    | (P) not observed<br>(F) <i>H. sphondylium</i> flowers                                                                                                           | En <sup>3</sup>   | He-ot <sup>1</sup>  |
| 69 | <i>M. beaumonti</i><br>NT<br>(van Lith, 1949)                        |   | 1 |    |   |    |    |    |    |    | 1   | mid June                              | (P) not observed<br>(F) <i>S. vulgaris</i> leaves                                                                                                               | Hy <sup>3</sup>   | He-ot <sup>1?</sup> |
| 70 | <i>M. dahlbomi</i><br>(Wesmael, 1852)                                | 1 |   |    |   |    |    |    |    |    | 1   | late May                              | (P) not observed<br>(F) <i>H. sphondylium</i> flowers                                                                                                           | Hy <sup>3</sup>   | He-ot <sup>1</sup>  |
| 71 | <i>Mimumesa littoralis</i><br>EN<br>(Bondroit, 1934)                 |   |   |    |   |    |    |    | 3  |    | 3   | early July –<br>mid August            | (P) and (F) not observed                                                                                                                                        | En <sup>3</sup>   | He-ot <sup>1</sup>  |
| 72 | <i>Miscophus ater</i><br>DD<br>Lepeletier de Saint-<br>Fargeau, 1845 |   | 8 | 2  | 1 | 17 | 16 | 8  |    | 12 | 64  | late May –<br>late Septem-<br>ber     | (P) and (F) not observed                                                                                                                                        | En <sup>3</sup>   | Are <sup>2</sup>    |
| 73 | <i>M. bicolor</i><br>Jurine, 1807                                    |   | 1 |    |   | 14 | 6  | 4  | 1  | 3  | 29  | mid June –<br>late Septem-<br>ber     | (P) and (F) not observed                                                                                                                                        | En <sup>3</sup>   | Are <sup>2</sup>    |
| 74 | <i>M. concolor</i><br>LC<br>Dahlbom, 1845                            |   |   |    |   | 6  | 1  |    |    | 2  | 9   | mid June –<br>early<br>August         | (P) and (F) not observed                                                                                                                                        | En <sup>3</sup>   | Are <sup>1</sup>    |
| 75 | <i>M. niger</i><br>LC<br>Dahlbom, 1844                               |   |   |    |   | 5  | 1  |    |    | 2  | 8   | late July –<br>late August            | (P) and (F) not observed                                                                                                                                        | En <sup>3</sup>   | Are <sup>2</sup>    |
| 76 | <i>M. postumus</i><br>VU<br>Bischoff, 1921                           |   |   |    |   |    | 2  | 3  |    |    | 5   | mid June –<br>mid August              | (P) and (F) not observed                                                                                                                                        | En <sup>3</sup>   | Are <sup>2?</sup>   |
| 77 | <i>M. spurius</i><br>LC<br>(Dahlbom, 1832)                           |   | 1 |    |   | 3  | 1  | 4  |    | 3  | 12  | early June –<br>late August           | (P) and (F) not observed                                                                                                                                        | En <sup>3</sup>   | Are <sup>2?</sup>   |
| 78 | <i>Nysson dimidiatus</i><br>Jurine, 1807                             |   | 2 |    |   |    |    |    | 2  |    | 4   | early July                            | (P) Kleptoparasite<br>(F) Apiaceae flowers                                                                                                                      | (En) <sup>3</sup> | Cle <sup>2</sup>    |
| 79 | <i>N. distinguendus</i>                                              |   |   |    |   | 1  |    | 1  |    |    | 2   | mid June                              | (P) Kleptoparasite                                                                                                                                              | (En) <sup>3</sup> | Cle <sup>2</sup>    |

|    |                                                     |   |    |    |    |    |   |   |    |    |                            |                                                                          |                                                                                                                                   |                  |                     |
|----|-----------------------------------------------------|---|----|----|----|----|---|---|----|----|----------------------------|--------------------------------------------------------------------------|-----------------------------------------------------------------------------------------------------------------------------------|------------------|---------------------|
|    | Chevrier, 1867                                      |   |    |    |    |    |   |   |    |    |                            |                                                                          | (F) Apiaceae flowers                                                                                                              |                  |                     |
| 80 | <i>N. maculosus</i><br>(Gmelin, 1790)               | 1 | 4  | 1  | 2  |    |   | 4 |    | 12 | mid June –<br>early August | (P) Kleptoparasite<br>(F) Apiaceae flowers                               | (En) <sup>3</sup>                                                                                                                 | Cle <sup>2</sup> |                     |
| 81 | <i>N. niger</i><br>LC<br>Chevrier, 1868             |   | 1  |    |    |    |   |   |    | 1  | early July                 | (P) Kleptoparasite<br>(F) not observed                                   | (En) <sup>3</sup>                                                                                                                 | Cle <sup>2</sup> |                     |
| 82 | <i>N. trimaculatus</i><br>(Rossi, 1790)             |   | 2  | 1  |    |    |   |   |    | 3  | mid July –<br>mid August   | (P) Kleptoparasite<br>(F) Honeydew on the leaves<br>of <i>T. cordata</i> | (En) <sup>3</sup>                                                                                                                 | Cle <sup>2</sup> |                     |
| 83 | <i>Oxybelus argentatus</i><br>LC<br>Curtis, 1833    |   |    | 2  | 1  |    | 3 |   |    | 6  | mid June –<br>early August | (P) and (F) not observed                                                 | En <sup>3</sup>                                                                                                                   | Dip <sup>2</sup> |                     |
| 84 | <i>O. bipunctatus</i><br>Olivier, 1812              | 1 | 34 | 27 | 1  | 38 | 3 | 6 | 12 | 14 | 136                        | early June –<br>mid September                                            | (P) Imagines of Stratiomyi-<br>dae, <i>Pollenia</i> spp.<br>(F) <i>H. sphondylium</i> and <i>P.</i><br><i>oreoselinum</i> flowers | En <sup>3</sup>  | Dip <sup>1</sup>    |
| 85 | <i>O. haemorrhoidalis</i><br>Olivier, 1812          | 1 | 2  |    | 3  |    | 2 |   |    | 2  | 10                         | mid June –<br>early August                                               | (P) Imagines of <i>Sarcophaga</i><br>spp. and Tachnidae<br>(F) <i>P. oreoselinum</i> flowers                                      | En <sup>3</sup>  | Dip <sup>2</sup>    |
| 86 | <i>O. mandibularis</i><br>Dahlbom, 1845             | 2 | 7  | 2  |    | 1  |   |   |    |    | 12                         | mid June –<br>late July                                                  | (P) not observed<br>(F) Apiaceae flowers                                                                                          | En <sup>3</sup>  | Dip <sup>1</sup>    |
| 87 | <i>O. quatuordecimno-<br/>tatus</i><br>Jurine, 1807 |   | 4  | 1  | 2  |    |   |   |    |    | 7                          | late June –<br>late July                                                 | (P) not observed<br>(F) Apiaceae flowers                                                                                          | En <sup>3</sup>  | Dip <sup>2</sup>    |
| 88 | <i>O. trispinosus</i><br>(Fabricius, 1787)          |   |    |    |    | 4  | 1 |   |    |    | 5                          | mid July –<br>late August                                                | (P) and (F) not observed                                                                                                          | En <sup>3</sup>  | Dip <sup>1</sup>    |
| 89 | <i>O. uniglumis</i><br>(Linnaeus, 1758)             | 2 | 6  | 14 | 48 |    |   |   |    |    | 70                         | mid June –<br>mid September                                              | (P) Imagines of <i>Anthomyia</i><br>spp.<br>(F) <i>P. oreoselinum</i> flowers                                                     | En <sup>3</sup>  | Dip <sup>1</sup>    |
| 90 | <i>O. variegatus</i><br>LC<br>Wesmael, 1852         | 5 | 8  | 4  | 2  |    | 1 |   |    |    | 20                         | late May –<br>early August                                               | (P) not observed<br>(F) <i>P. oreoselinum</i> flowers                                                                             | En <sup>3</sup>  | Dip <sup>1</sup>    |
| 91 | <i>Passaloecus borealis</i><br>Dahlbom, 1844        |   |    |    |    |    |   | 1 |    |    | 1                          | late August                                                              | (P) and (F) not observed                                                                                                          | Hy <sup>3</sup>  | He-ap <sup>2</sup>  |
| 92 | <i>P. brevilabris</i><br>DD<br>Wolf, 1958           |   |    |    |    |    |   | 2 |    |    | 2                          | late June                                                                | (P) and (F) not observed                                                                                                          | Hy <sup>3</sup>  | He-ap <sup>1?</sup> |
| 93 | <i>P. gracilis</i><br>(Curtis, 1834)                |   |    |    | 1  |    |   | 2 |    |    | 3                          | late June –<br>early July                                                | (P) and (F) not observed                                                                                                          | Hy <sup>3</sup>  | He-ap <sup>1</sup>  |
| 94 | <i>P. pictus</i><br>Ribaut, 1952                    | 1 |    |    |    | 1  |   | 1 |    |    | 3                          | mid – late<br>July                                                       | not observed                                                                                                                      | En <sup>4</sup>  | He-ap <sup>2</sup>  |
| 95 | <i>P. singularis</i><br>Dahlbom, 1844               | 3 | 3  | 2  | 1  |    |   |   | 1  |    | 10                         | late June –<br>mid August                                                | (P) not observed<br>(F) Honeydew on the leaves<br>of <i>T. cordata</i>                                                            | Hy <sup>3</sup>  | He-ap <sup>1</sup>  |

|     |                                                         |   |    |    |   |    |   |              |                          |                                    |                                                                                                                   |                                                                                                                   |                                                                                                                                                           |                     |                  |
|-----|---------------------------------------------------------|---|----|----|---|----|---|--------------|--------------------------|------------------------------------|-------------------------------------------------------------------------------------------------------------------|-------------------------------------------------------------------------------------------------------------------|-----------------------------------------------------------------------------------------------------------------------------------------------------------|---------------------|------------------|
| 96  | <i>Pemphredon fabricii</i><br>M. Müller, 1911           | 5 | 10 |    |   |    |   | 15           |                          |                                    | mid June –<br>late July                                                                                           | (P) not observed<br>(F) <i>H. sphondylium</i> flowers<br>and honeydew on the leaves<br>of <i>T. cordata</i>       | Hy <sup>3</sup>                                                                                                                                           | He-ap <sup>2?</sup> |                  |
| 97  | <i>P. inornata</i><br>Say, 1824                         | 7 | 2  | 3  | 2 |    |   |              | 14                       |                                    | mid May –<br>early August                                                                                         | (P) not observed<br>(F) <i>Solidago</i> spp. flowers and<br>honeydew on the leaves of <i>T.</i><br><i>cordata</i> | Hy <sup>3</sup>                                                                                                                                           | He-ap <sup>1</sup>  |                  |
| 98  | <i>P. lethifer</i><br>(Shuckard, 1837)                  | 1 | 3  | 1  |   |    |   | 2            | 1                        | 8                                  | mid May –<br>mid Septem-<br>ber                                                                                   | (P) not observed<br>(F) Apiaceae and <i>Solidago</i><br>spp. flowers                                              | Hy <sup>3</sup>                                                                                                                                           | He-ap <sup>1</sup>  |                  |
| 99  | <i>P. lugubris</i><br>(Fabricius, 1793)                 | 1 | 1  | 3  |   |    |   | 5            |                          | mid May –<br>mid July              | (P) not observed<br>(F) <i>Solidago</i> spp. flowers                                                              | Hy <sup>3</sup>                                                                                                   | He-ap <sup>1</sup>                                                                                                                                        |                     |                  |
| 100 | <i>P. montana</i><br>Dahlbom, 1844                      | 1 | 1  | 1  | 2 | 1  |   |              |                          | 6                                  | late May –<br>mid August                                                                                          | (P) not observed<br>(F) Honeydew on the leaves<br>of <i>T. cordata</i>                                            | Hy <sup>3</sup>                                                                                                                                           | He-ap <sup>1</sup>  |                  |
| 101 | <i>P. rugifer</i><br>(Dahlbom, 1844)                    | 1 |    | 1  |   |    |   | 1            |                          | early August                       | (P) and (F) not observed                                                                                          | Hy <sup>3</sup>                                                                                                   | He-ap <sup>2</sup>                                                                                                                                        |                     |                  |
| 102 | <i>P. spp.</i>                                          | 4 | 4  | 1  | 1 |    |   |              | 10                       |                                    | late May –<br>late August                                                                                         | (P) and (F) not observed                                                                                          | Hy <sup>3</sup>                                                                                                                                           | He-ap <sup>1</sup>  |                  |
| 103 | <i>P. wesmaeli</i><br>(A. Morawitz, 1864)               | 1 | 1  | 2  |   |    |   | 2            |                          | mid June –<br>early July           | (P) and (F) not observed                                                                                          | Hy <sup>3</sup>                                                                                                   | He-ap <sup>1</sup>                                                                                                                                        |                     |                  |
| 104 | <i>Philanthus triangu-<br/>lum</i><br>(Fabricius, 1775) | 4 | 16 | 10 | 3 | 4  | 1 | 6            | 3                        | 6                                  | 53                                                                                                                | mid June –<br>mid Septem-<br>ber                                                                                  | (P) Imagines of <i>Apis mellifera</i><br>L.<br>(F) <i>M. albus</i> , <i>Solidago</i> spp., <i>T.</i><br><i>serpyllum</i> and <i>V. spicata</i><br>flowers | En <sup>3</sup>     | Hym <sup>1</sup> |
| 105 | <i>Psenulus laevigatus</i><br>(Schenck, 1857)           | 2 | 3  |    | 1 | 6  |   |              |                          | mid May –<br>mid July              | (F) Honeydew on the leaves<br>of <i>T. cordata</i>                                                                | Hy <sup>3</sup>                                                                                                   | He-ap <sup>2</sup>                                                                                                                                        |                     |                  |
| 106 | <i>P. meridionalis</i><br>de Beaumont, 1937             | 1 |    |    |   | 1  |   |              |                          | early July                         | (P) not observed<br>(F) <i>Solidago</i> spp. flowers                                                              | Hy <sup>3</sup>                                                                                                   | He-ap <sup>2?</sup>                                                                                                                                       |                     |                  |
| 107 | <i>P. pallipes</i><br>(Panzer, 1798)                    | 6 | 1  | 7  | 1 | 15 |   |              |                          | late May –<br>mid August           | (P) not observed<br>(F) <i>Solidago</i> spp. flowers and<br>honeydew on the leaves of <i>T.</i><br><i>cordata</i> | Hy <sup>3</sup>                                                                                                   | He-ap <sup>1</sup>                                                                                                                                        |                     |                  |
| 108 | <i>P. schencki</i><br>(Tournier, 1889)                  | 1 | 1  |    |   |    | 2 |              | mid May –<br>late June   | (P) and (F) not observed           | Hy <sup>3</sup>                                                                                                   | He-ap <sup>1</sup>                                                                                                |                                                                                                                                                           |                     |                  |
| 109 | <i>Rhopalum coarcta-<br/>tum</i><br>(Scopoli, 1763)     | 5 |    |    |   | 5  |   |              |                          | mid July –<br>early Sep-<br>tember | (P) and (F) not observed                                                                                          | Hy <sup>3</sup>                                                                                                   | Dip(Pso,Neu) <sup>1</sup>                                                                                                                                 |                     |                  |
| 110 | <i>Solierella compedita</i><br>(Piccioli, 1869)         | 1 |    |    |   | 1  |   | mid June     | (P) and (F) not observed | Hy(En) <sup>3</sup>                | He-ot <sup>2</sup>                                                                                                |                                                                                                                   |                                                                                                                                                           |                     |                  |
| 111 | <i>Spilomena enslini</i><br>Blüthgen, 1953              | 1 |    |    |   | 1  |   | early August | (P) and (F) not observed | Hy <sup>3</sup>                    | Thy <sup>1</sup>                                                                                                  |                                                                                                                   |                                                                                                                                                           |                     |                  |
| 112 | <i>Stigmus solskyi</i>                                  | 1 |    |    |   | 1  |   | late June    | (P) and (F) not observed | Hy <sup>3</sup>                    | He-ap <sup>1</sup>                                                                                                |                                                                                                                   |                                                                                                                                                           |                     |                  |

|                   |                                                                                |   |    |   |    |    |    |    |    |                              |                                                                                                         |                                                                                                      |                                                                                                      |                   |                   |
|-------------------|--------------------------------------------------------------------------------|---|----|---|----|----|----|----|----|------------------------------|---------------------------------------------------------------------------------------------------------|------------------------------------------------------------------------------------------------------|------------------------------------------------------------------------------------------------------|-------------------|-------------------|
| A. Morawitz, 1864 |                                                                                |   |    |   |    |    |    |    |    |                              |                                                                                                         |                                                                                                      |                                                                                                      |                   |                   |
| 113               | <i>Stizus perrisi</i><br>CR<br>Dufour, 1838                                    |   |    |   |    | 4  | 2  |    | 6  | late May –<br>late           | (P) not observed<br>(F) <i>P. oreoselinum</i> flowers                                                   | En <sup>3</sup>                                                                                      | Ort <sup>2</sup>                                                                                     |                   |                   |
| June              |                                                                                |   |    |   |    |    |    |    |    |                              |                                                                                                         |                                                                                                      |                                                                                                      |                   |                   |
| 114               | <i>Tachysphex austriacus</i><br>Kohl, 1892                                     | 1 | 1  |   |    | 1  | 4  |    | 7  | early June –<br>late June    | (P) and (F) not observed                                                                                | En <sup>3</sup>                                                                                      | Ort <sup>1?</sup>                                                                                    |                   |                   |
| 115               | <i>T. fulvitarsis</i><br>LC<br>(A. Costa, 1867)                                | 3 | 1  | 1 | 1  | 1  | 1  | 1  | 9  | mid June –<br>mid July       | (P) not observed<br>(F) <i>Sedum</i> spp. flowers                                                       | En <sup>3</sup>                                                                                      | Ort <sup>1</sup>                                                                                     |                   |                   |
| 116               | <i>T. helveticus</i><br>Kohl, 1885                                             | 5 |    | 1 | 7  | 4  |    | 5  | 22 | late May –<br>mid August     | (P) not observed<br>(F) <i>P. oreoselinum</i> , <i>Scleranthus</i> spp. and <i>T. serpyllum</i> flowers | En <sup>3</sup>                                                                                      | Ort <sup>1</sup>                                                                                     |                   |                   |
| 117               | <i>T. nitidus</i><br>(Spinola, 1806)                                           |   |    |   | 1  | 18 | 7  | 1  | 27 | late April –<br>early August | (P) not observed<br>(F) <i>Scleranthus</i> spp., <i>Solidago</i> spp. and <i>T. serpyllum</i> flowers   | En <sup>3</sup>                                                                                      | Ort <sup>1</sup>                                                                                     |                   |                   |
| 118               | <i>T. obscuripennis</i><br>(Schenck, 1857)                                     | 2 | 1  |   | 22 | 22 | 9  | 4  | 27 | 87                           | early June –<br>mid August                                                                              | (P) not observed<br>(F) <i>P. oreoselinum</i> , <i>Solidago</i> spp. and <i>T. serpyllum</i> flowers | En <sup>3</sup>                                                                                      | Bla <sup>1</sup>  |                   |
| 119               | <i>T. panzeri</i><br>(Vander Linden, 1829)                                     |   | 1  | 1 |    | 4  | 12 | 22 | 1  | 41                           | early June –<br>late July                                                                               | (P) not observed<br>(F) <i>P. oreoselinum</i> , <i>Solidago</i> spp. and <i>T. serpyllum</i> flowers | En <sup>3</sup>                                                                                      | Ort <sup>2</sup>  |                   |
| 120               | <i>T. pompiliiformis</i><br>(Panzer, 1803)                                     |   | 17 | 6 |    | 7  |    | 5  | 1  | 13                           | 49                                                                                                      | early May –<br>mid August                                                                            | (P) not observed<br>(F) <i>P. oreoselinum</i> , <i>Solidago</i> spp. and <i>T. serpyllum</i> flowers | En <sup>3</sup>   | Ort <sup>1</sup>  |
| 121               | <i>T. psammobius</i><br>LC<br>(Kohl, 1880)                                     |   | 11 | 1 | 1  |    | 1  | 2  | 1  | 2                            | 19                                                                                                      | late April –<br>mid July                                                                             | (P) not observed<br>(F) <i>P. oreoselinum</i> and <i>T. serpyllum</i> flowers                        | En <sup>3</sup>   | Ort <sup>2?</sup> |
| 122               | <i>T. tarsinus</i><br>DD<br>(Lepeletier de Saint-Fargeau, 1845)                |   |    |   |    | 2  | 2  |    | 1  | 5                            | late June –<br>early July                                                                               | (P) and (F) not observed                                                                             | En <sup>3</sup>                                                                                      | Ort <sup>2?</sup> |                   |
| 123               | <i>T. unicolor</i><br>(Panzer, 1809)                                           |   | 3  |   |    | 1  |    | 3  | 5  | 3                            | 15                                                                                                      | early June –<br>mid August                                                                           | (P) not observed<br>(F) <i>T. serpyllum</i> flowers                                                  | En <sup>3</sup>   | Ort <sup>2</sup>  |
| 124               | <i>Trypoxylon attenuatum</i><br>F. Smith, 1851                                 | 1 |    | 6 |    |    |    |    |    |                              | 7                                                                                                       | late June –<br>late July                                                                             | (P) not observed<br>(F) Honeydew on the leaves of <i>T. cordata</i>                                  | Hy <sup>3</sup>   | Are <sup>1</sup>  |
| 125               | <i>T. clavicerum</i><br>Lepeletier de Saint-Fargeau and Audinet-Serville, 1828 | 3 | 3  |   |    |    |    |    |    |                              | 6                                                                                                       | early June –<br>late July                                                                            | (P) not observed<br>(F) Honeydew on the leaves of <i>T. cordata</i>                                  | Hy <sup>3</sup>   | Are <sup>1</sup>  |
| 126               | <i>T. deceptorium</i><br>Antropov, 1991                                        | 1 |    | 2 | 1  | 1  |    |    |    |                              | 5                                                                                                       | mid July –<br>late August                                                                            | (P) not observed                                                                                     | Hy <sup>3</sup>   | Are <sup>2?</sup> |

|                        |                                                      |     |     |     |     |     |     |     |     |                            |                                                   | (F) Honeydew on the leaves<br>of <i>T. cordata</i>                              |                                                                                                           |                                                                                                                                                                                                          |                  |                  |
|------------------------|------------------------------------------------------|-----|-----|-----|-----|-----|-----|-----|-----|----------------------------|---------------------------------------------------|---------------------------------------------------------------------------------|-----------------------------------------------------------------------------------------------------------|----------------------------------------------------------------------------------------------------------------------------------------------------------------------------------------------------------|------------------|------------------|
| 127                    | <i>T. figulus</i><br>(Linnaeus, 1758)                | 2   | 1   |     |     |     |     |     | 3   | mid June –<br>late August  | (P) not observed<br>(F) <i>S. vulgaris</i> leaves | Hy <sup>3</sup>                                                                 | Are <sup>1</sup>                                                                                          |                                                                                                                                                                                                          |                  |                  |
| 128                    | <i>T. medium</i><br>de Beaumont, 1945                | 1   |     |     |     | 1   |     |     | 2   | mid June –<br>early August | (P) and (F) not observed                          | Hy <sup>3</sup>                                                                 | Are <sup>2</sup>                                                                                          |                                                                                                                                                                                                          |                  |                  |
| 129                    | <i>T. minus</i><br>de Beaumont, 1945                 | 15  | 7   | 16  | 6   | 1   | 8   | 4   | 1   | 58                         | late May –<br>late August                         | (P) not observed<br>(F) Honeydew on the leaves<br>of <i>T. cordata</i>          | Hy <sup>3</sup>                                                                                           | Are <sup>2?</sup>                                                                                                                                                                                        |                  |                  |
| 130                    | <i>Ammophila cam-<br/>pestris</i><br>Latreille, 1809 | 1   |     |     | 7   | 45  | 30  | 1   | 3   | 87                         | may – late<br>August                              | (P) not observed<br>(F) <i>T. serpyllum</i> and <i>Solidago</i><br>spp. flowers | En <sup>3</sup>                                                                                           | Hym <sup>1</sup>                                                                                                                                                                                         |                  |                  |
| 131                    | <i>A. pubescens</i><br>Curtis, 1836                  |     |     |     | 3   |     |     |     | 5   | 8                          | late May –<br>mid August                          | (P) Larvae of Geometridae<br>(F) <i>Solidago</i> spp. flowers                   | En <sup>3</sup>                                                                                           | Lep(Hym) <sup>1</sup>                                                                                                                                                                                    |                  |                  |
| 132                    | <i>A. sabulosa</i><br>(Linnaeus, 1758)               | 76  |     |     | 15  | 8   | 29  | 14  | 21  | 21                         | 68                                                | 252                                                                             | mid May –<br>early Octo-<br>ber                                                                           | (P) Larvae of <i>Panolis</i><br><i>flammea</i> (Denis &<br>Schiff.)<br>(F) <i>J. montana</i> , <i>Soli-<br/>dago</i> spp., <i>Teucrium</i><br>spp., <i>T. serpyllum</i> and<br><i>V. spicata</i> flowers | En <sup>3</sup>  | Lep <sup>1</sup> |
| 133                    | <i>Podalonia affinis</i><br>(W. Kirby, 1798)         | 17  |     |     | 1   | 11  | 3   | 3   | 2   | 37                         |                                                   |                                                                                 | mid May –<br>mid Septem-<br>ber                                                                           | (P) not observed<br>(F) <i>V. spicata</i> and <i>P.<br/>oreoselinum</i> flowers                                                                                                                          | En <sup>3</sup>  | Lep <sup>1</sup> |
| 134                    | <i>P. hirsuta</i><br>(Scopoli, 1763)                 | 1   |     |     | 7   |     |     |     | 7   | 13                         | 28                                                | late May –<br>mid Septem-<br>ber                                                | (P) not observed<br>(F) <i>P. oreoselinum</i> ,<br><i>Solidago</i> spp. and <i>V.<br/>spicata</i> flowers | En <sup>3</sup>                                                                                                                                                                                          | Lep <sup>1</sup> |                  |
| 135                    | <i>P. luffii</i><br>(Saunders, 1903)                 |     |     |     |     | 1   | 15  | 1   | 17  |                            |                                                   | late May –<br>mid Septem-<br>ber                                                | (P) not observed<br>(F) <i>T. serpyllum</i> flow-<br>ers                                                  | En <sup>3</sup>                                                                                                                                                                                          | Lep <sup>2</sup> |                  |
| 136                    | <i>Sphex funerarius</i><br>Gussakovskij, 1934        | 1   |     |     |     | 5   | 27  | 33  |     |                            | mid July –<br>early Sep-<br>tember                | (P) not observed<br>(F) <i>T. serpyllum</i> and<br><i>M. albus</i> flowers      | En <sup>3</sup>                                                                                           | Ort <sup>2</sup>                                                                                                                                                                                         |                  |                  |
| Total of specimens (N) |                                                      | 152 | 563 | 312 | 220 | 409 | 339 | 375 | 224 | 322                        | 2916                                              |                                                                                 |                                                                                                           |                                                                                                                                                                                                          |                  |                  |
| Number of species (S)  |                                                      | 59  | 81  | 52  | 53  | 48  | 43  | 50  | 46  | 38                         | 136                                               |                                                                                 |                                                                                                           |                                                                                                                                                                                                          |                  |                  |

<sup>1</sup> Lomholdt 1984; <sup>2</sup> Blösch 2000; <sup>3</sup> Witt 2009; <sup>4</sup> Janvier 1961; Abbreviations: Status: CR - critically endangered, EN – Endangered, VU – vulnerable, NT - near threatened, LC - least concern, DD - data-deficient, Nesting: En – endogeic (digging nests in the soil and occupying existing cracks in the soil), Hy - hypogeic (nesting above the ground in woods or plant shoots.), Prey: Dip – Diptera, Col – Coleoptera, Hym – Hymenoptera, Lep – Lepidoptera, Tri – Trichoptera, Ort – Orthoptera, Are – Araneae, Bla – Blattodea, He-ap – Hemiptera-Aphidoidea, He-ot – Hemiptera-other, Thy – Thysanoptera, Pso – Psocoptera, Neu – Neuroptera.

**Table s2.** Flight periods for the 15 most abundant species (those with 50+ records, shown in descending order of abundance). Months are represented by their numerals, 5=May etc.

| Species                            | n   | 5 | 6 | 7 | 8 | 9 | 10 |
|------------------------------------|-----|---|---|---|---|---|----|
| <i>Ammophila sabulosa</i>          | 252 |   |   |   |   |   |    |
| <i>Bembecinus tridens</i>          | 227 |   |   |   |   |   |    |
| <i>Diodontus minutus</i>           | 191 |   |   |   |   |   |    |
| <i>Oxybelus bipunctatus</i>        | 136 |   |   |   |   |   |    |
| <i>Mellinus arvensis</i>           | 114 |   |   |   |   |   |    |
| <i>Cerceris rybyensis</i>          | 95  |   |   |   |   |   |    |
| <i>Tachysphex obscuripennis</i>    | 87  |   |   |   |   |   |    |
| <i>Ammophila campestris</i>        | 87  |   |   |   |   |   |    |
| <i>Oxybelus uniglumis</i>          | 70  |   |   |   |   |   |    |
| <i>Miscophus ater</i>              | 64  |   |   |   |   |   |    |
| <i>Alysson spinosus</i>            | 62  |   |   |   |   |   |    |
| <i>Cerceris quinquefasciata</i>    | 59  |   |   |   |   |   |    |
| <i>Trypoxylon minus</i>            | 58  |   |   |   |   |   |    |
| <i>Philanthus triangulum</i>       | 53  |   |   |   |   |   |    |
| <i>Crossocerus quadrimaculatus</i> | 51  |   |   |   |   |   |    |
